# Supplementary material for: Assessing the quality of health research from an Indigenous perspective: the Aboriginal and Torres Strait Islander quality appraisal tool
Source: PubMed Central journal article supplement (PMC7147059; doi:10.1186/s12874-020-00959-3), 2020-04-10
Supplement: 12874_2020_959_MOESM3_ESM.pdf [file 12874_2020_959_MOESM3_ESM.pdf]

### Supplementary File 3 – Articles Used in Stages 2 and 3 of Piloting

| Stage 2                                                                                                                                                                                                                                                                                |
|----------------------------------------------------------------------------------------------------------------------------------------------------------------------------------------------------------------------------------------------------------------------------------------|
| Hinton R, Kavanagh DJ, Barclay L, Chenhall R, Nagel T. Developing a best practice pathway to support improvements in Indigenous Australians' mental health and well-being: a qualitative study. <i>BMJ Open</i> . 2015;5(8).                                                           |
| Williams R, Lawrence C, Wilkes E, Shipp M, Henry B, Eades S, et al. Sexual behaviour, drug use and health service use by young Noongar people in Western Australia: a snapshot. <i>Sexual health</i> . 2015;12(3):188-93.                                                              |
| Stage 3                                                                                                                                                                                                                                                                                |
| Gowing CJ, McDermott KM, Ward LM, Martin BL. Ten years of trauma in the 'top end' of the Northern Territory, Australia: a retrospective analysis. <i>International emergency nursing</i> . 2015;23(1):17-21.                                                                           |
| Johnson DR, McDermott RA, Clifton PM, D'Onise K, Taylor SM, Preece CL, et al. Characteristics of Indigenous adults with poorly controlled diabetes in north Queensland: implications for services. <i>BMC public health</i> . 2015;15:325.                                             |
| Kendall E, Barnett L. Principles for the development of Aboriginal health interventions: culturally appropriate methods through systemic empathy. <i>Ethnicity &amp; health</i> . 2015;20(5):437-52.                                                                                   |
| Kickett-Tucker CS, Christensen D, Lawrence D, Zubrick SR, Johnson DJ, Stanley F. Development and validation of the Australian Aboriginal racial identity and self-esteem survey for 8-12 year old children (IRISE_C). <i>International journal for equity in health</i> . 2015;14:103. |
| Lowell A, Kildea S, Liddle M, Cox B, Paterson B. Supporting aboriginal knowledge and practice in health care: lessons from a qualitative evaluation of the strong women, strong babies, strong culture program. <i>BMC pregnancy and childbirth</i> . 2015;15:19.                      |
| O'Grady KA, Dunbar M, Medlin LG, Hall KK, Toombs M, Meiklejohn J, et al. Uptake of influenza vaccination in pregnancy amongst Australian Aboriginal and Torres Strait Islander women: a mixed-methods pilot study. <i>BMC research notes</i> . 2015;8:169.                             |
